# Supplementary material for: Circulating Reactive Oxygen Species in Adults with Congenital Heart Disease
Source: MDPI journal article supplement (doi:10.3390/antiox11122369), 2022-11-30
Supplement: s1 [file s1]

## Figures

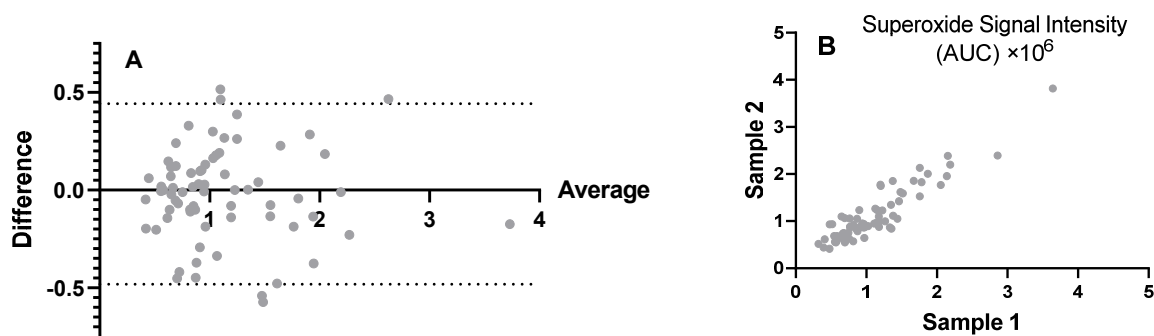

**Figure S1.** Bland-Altman visualisation (A) and scatter plot (B) of the two samples measuring superoxide anion radical levels. Limits of agreement: lower -0.48, upper 0.44.

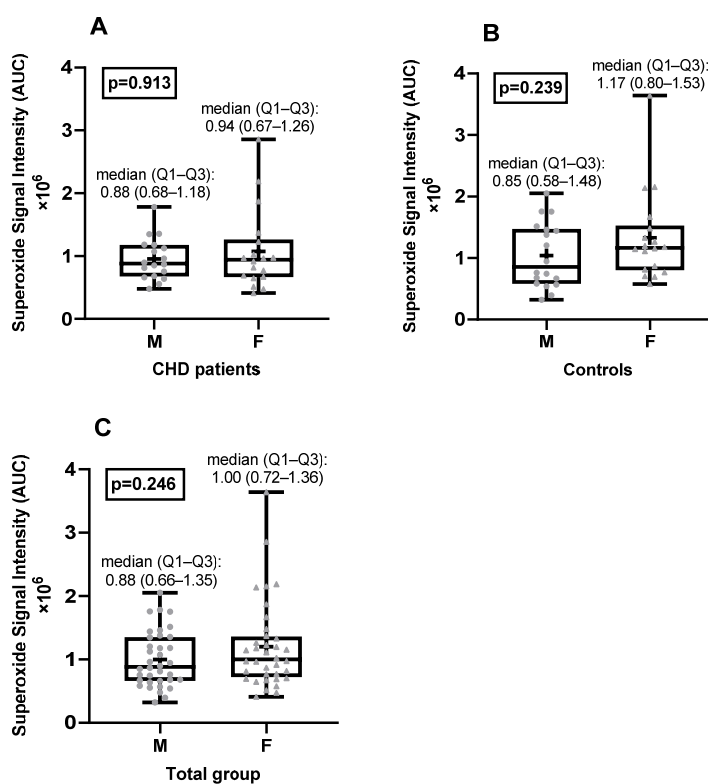

**Figure S2:** Comparison of superoxide anion radical levels between male and female subjects in CHD patients (A), healthy controls (B) and the total group (C). AUC = area under the curve, M = male, F = female.

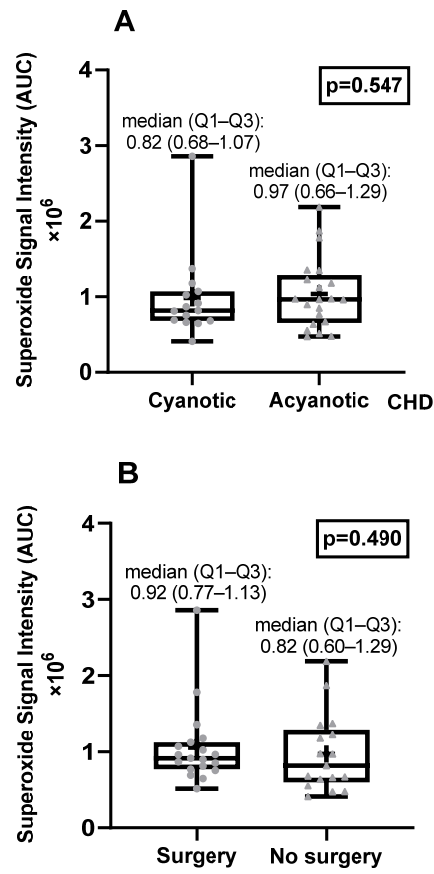

**Figure S3.** Comparison of superoxide anion radical levels between cyanotic and acyanotic CHD (A) and CHD patients with and without a surgical history (B). AUC = area under the curve, CHD = congenital heart disease

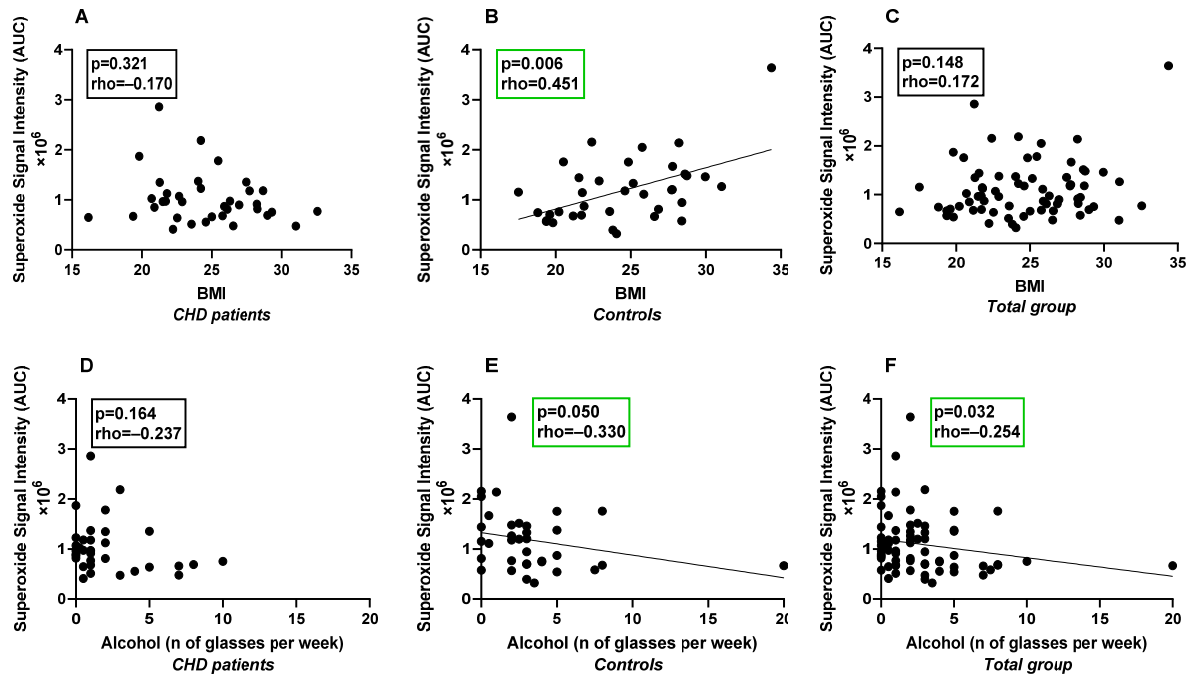

**Figure S4.** Correlation of superoxide anion radical levels with BMI and alcohol consumption in CHD patients (A+D), healthy controls (B+E) and the total group (C+F). AUC = area under the curve, BMI = body mass index, n = amount, rho = Spearman's rho.

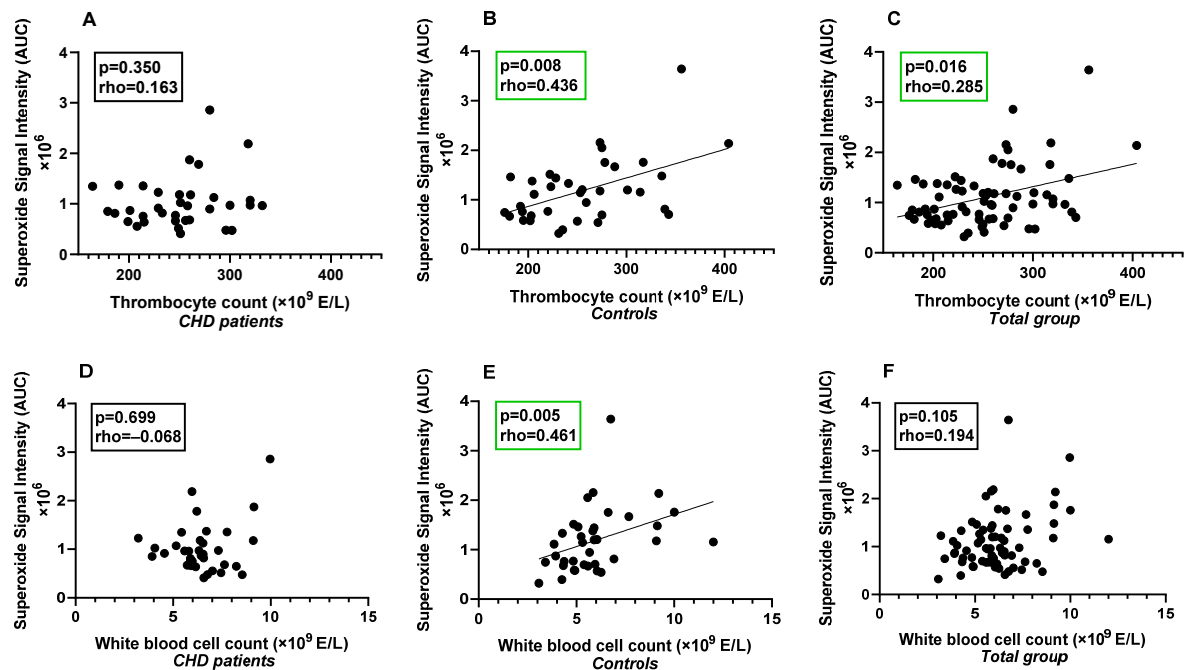

**Figure S5.** Correlation of superoxide anion radical levels with thrombocyte count and white blood cell count in CHD patients (A+D), healthy controls (B+E) and the total group (C+F). AUC = area under the curve, rho = Spearman's rho.

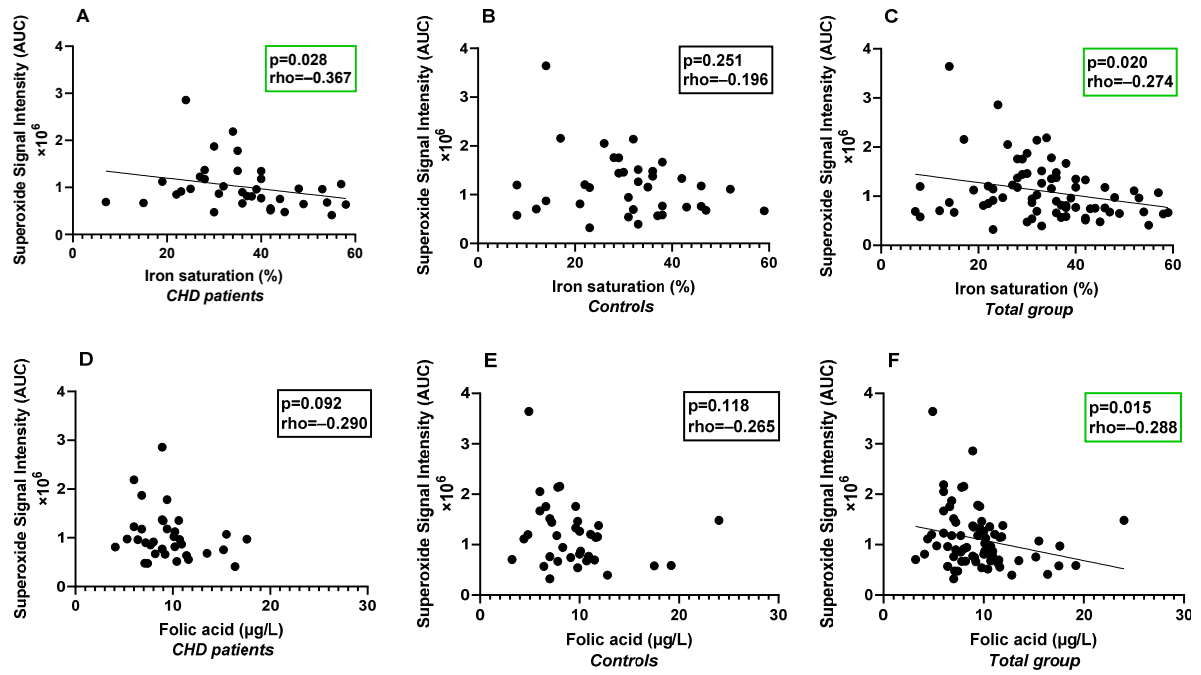

**Figure S6.** Correlation of superoxide anion radical levels with iron saturation and folic acid in CHD patients (A+D), healthy controls (B+E) and the total group (C+F). AUC = area under the curve, rho = Spearman's rho.
